# Supplementary material for: Association between glucose‑potassium ratio and all-cause mortality in patients with cardiogenic shock: a retrospective study
Source: Research Square preprint supplement (doi:10.21203/rs.3.rs-6515927/v1), 2025-05-13
Supplement: Supplementary file 1 [file 36a2e938bafe92173b80c590.docx]

**Supplemental Table 1. Disease diagnosis of this study and corresponding ICD codes.**

| **Disease diagnosis** | **ICD-9 codes** | **ICD-10 codes** |
| --- | --- | --- |
| Heart failure | 428.0-428.4, 428.9 | I50.0- I50.4, I50.8, I50.9 |
| Acute myocardial infarction | 410.0-410.5 | I21.0-I21.4, I21.9, I22, I23 |
| Chronic pulmonary disease | 490, 505, 4168, 4169, 5064, 5081, 5088 | J40, J47, J60, J67, I278, I279, J684, J701, J703 |
| Hypertension | 401.0, 401.1, 401.9, 405.01, 405.09, 405.11, 405.19, 405.91, 405.9 | I10, I15, I15.0-I15.2, I15.8, I15.9 |
| Diabetes | 250.0-250.9 | E10-E14.9 |
| Renal disease | 580-586 | N00, N03, N10, N11, N17, N18, N19 |
| Malignant cancer | 140, 172, 174.0, 195.8, 200, 208, 238.6 | C43, C88, C00-C26, C30-C34, C37-C41, C45-C58, C60-C76, C81-C85, C90-C97 |
| Respiratory failure | 518.81- 518.83 | J96.0-J96.2, J80 |
| Cardiogenic shock | 785.51 | R57.0 |
| Stroke | 430-437 | I60- I69, G45 |

**Supplemental Table 2. Missing number for risk variables and outcome variables**

| **Risk Variables** | **Missing number (%)** |
| --- | --- |
| Age (years) | 0 |
| Sex | 0 |
| Los hospital day | 0 |
| Los ICU day | 0 |
| Weight (kg) | 24 (1.72%) |
| BMI | 348 (24.91%) |
| HR, beats/min | 1 (0.07%) |
| RR, times/min | 1 (0.07%) |
| Temperature °C | 141 (10.09%) |
| SBP, mmHg | 4 (0.29%) |
| DBP, mmHg | 4 (0.29%) |
| **Medication situation** |  |
| Epinephrine | 0 |
| Dobutamine | 0 |
| Dopamine | 0 |
| ACEI/ARB | 0 |
| Diuretic | 0 |
| Potassium-sparing diuretic | 0 |
| IABP | 39 (2.79%) |
| **Disease Severity Score** |  |
| SOFA | 0 |
| APS III | 0 |
| SAPS II | 0 |
| OASIS | 0 |
| CCI | 0 |
| **Comorbidities** |  |
| Heart failure | 0 |
| Respiratory failure | 0 |
| AMI | 0 |
| Hypertension | 0 |
| Diabetes | 0 |
| Stroke | 0 |
| **Laboratory tests** |  |
| WBC, K/uL | 91 (6.51%) |
| RBC, m/uL | 91 (6.51%) |
| Platelet, K/uL | 88 (6.30%) |
| Hemoglobin, g/dL | 88 (6.30%) |
| MCV (fL) | 91 (6.51%) |
| RDW (%) | 93 (6.66%) |
| Glucose, mg/dl | 0 |
| Potassium, mmol/l | 0 |
| BUN, mg/dl | 2 (0.14%) |
| Chloride, mEq/L | 2 (0.14%) |
| Creatinine, mg/dl | 0 |
| AST, U/L | 48 (3.44%) |
| AST, U/L | 48 (3.44%) |
| Anion gap (mmol/L) | 6 (0.43%) |
| Bilirubin (umol/L) | 53 (3.79%) |
| GPR | 0 |

Abbreviation: GPR, glucose‑potassium ratio; HR, heart rate; RR, respiratory rate; BMI, body mass index; SBP, systolic blood pressure; DBP, diastolic blood pressure ACEI/ARB, Angiotensin-Converting Enzyme Inhibitor/ angiotensin receptor blocker; IABP, Intra-Aortic Balloon Pump; SOFA, sequential organ failure assessment; CCI, Charlson comorbidity index; APSIII, acute physiology score III; SAPSII, simplified acute physiological score II; OASIS, oxford acute severity of illness score; AMI, acute myocardial infarction; WBC, white blood cell; RBC, red blood cell; MCV, mean corpuscular volume; RDW, Red blood cell distribution width; BUN, blood urea nitrogen; AST, Aspartate aminotransferase; ALT, alanine aminotransferase

**Supplemental Table 3.** The prediction model with multivariate cox regression

| **Variable** | **Multivariate analysis**  **HR (95%CI)** | **P** |
| --- | --- | --- |
| Respiratory rate | 1.040(1.001-1.073) | 0.016 |
| Temperature | 0.734 (0.633-0.851) | <0.001 |
| Anion gap | 1.054(1.028-1.080) | <0.001 |
| BUN | 1.011(1.004-1.017) | 0.001 |
| Epinephrine | 1.642(1.155-2.334) | 0.005 |
| Dopamine | 1.829(1.373-2.437) | <0.001 |
| ACEI/ARB | 0.248(0.182- 0.338) | <0.001 |
| Diuretic | 0.296(0.213-0.411) | <0.001 |
| APSIII score | 1.003(0.993-1.014) | 0.500 |
| SAPSII score | 0.946(0.923-0.971) | 0.113 |
| CCI score | 1.078(1.024-1.135) | <0.001 |

**Supplemental Table 4.** Sensitivity analysis for 30 and 120-day all-cause mortality

| **Variables** | **Model1** | | **Model2** | | **Model3** | |
| --- | --- | --- | --- | --- | --- | --- |
| **HR (95%CI)** | ***P*** | **HR (95%CI)** | ***P*** | **HR (95%CI)** | ***P*** |
| **30-day all-cause mortality** |  |  |  |  |  |  |
| Continuous variable (per unit) | 1.227(1.172,1.285) | <0.0001 | 1.199(1.135,1.268) | <0.0001 | 1.1(1.024,1.180) | 0.009 |
| GPR quantile |  |  |  |  |  |  |
| 1 (N=280) | 1 (Reference) |  | 1 (Reference) |  | 1 (Reference) |  |
| 2 (N=279) | 1.014(0.621,1.654) | 0.957 | 1.043(0.639,1.703) | 0.867 | 1.091(0.666,1.788) | 0.730 |
| 3 (N=279) | 1.220(0.764,1.947) | 0.404 | 1.246(0.781,1.989) | 0.356 | 1.125(0.703,1.800) | 0.624 |
| 4 (N=279) | 1.630(1.046,2.540) | 0.031 | 1.575(1.011,2.455) | 0.045 | 1.349(0.861,2.114) | 0.192 |
| 5 (N=280) | 3.160(2.114,4.723) | <0.0001 | 2.618(1.738,3.943) | <0.0001 | 1.751(1.150,2.665) | 0.009 |
| **120-day all-cause mortality** |  |  |  |  |  |  |
| Continuous variable (per unit) | 1.227(1.172,1.285) | <0.0001 | 1.198(1.133,1.266) | <0.0001 | 1.099(1.024,1.180) | 0.009 |
| 1 (N=280) | 1.00 (Reference) |  | 1.00 (Reference) |  | 1.00 (Reference) |  |
| 2 (N=279) | 0.982(0.604,1.597) | 0.942 | 1.015(0.624,1.651) | 0.953 | 1.057(0.647,1.726) | 0.825 |
| 3 (N=279) | 1.307(0.830,2.058) | 0.247 | 1.343(0.853,2.114) | 0.203 | 1.224(0.775,1.934) | 0.385 |
| 4 (N=279) | 1.613(1.041,2.499) | 0.032 | 1.564(1.009,2.424) | 0.045 | 1.345(0.863,2.096) | 0.190 |
| 5 (N=280) | 3.094(2.081,4.601) | <0.0001 | 2.561(1.709,3.837) | <0.0001 | 1.730(1.142,2.621) | 0.010 |

HR: Hazard Ratio, CI: Confidence Interval, GPR: glucose‑potassium ratio

Model1: Crude

Model2: Adjust: respiratory rate, Temperature

Model3: model2 plus Anion gap, BUN, Epinephrine, Diuretic, Dopamine, ACEI/ARB, CCI score
