# Supplementary material for: Association between glucose‑potassium ratio and all-cause mortality in patients with cardiogenic shock: a retrospective study
Source: Research Square preprint supplement (doi:10.21203/rs.3.rs-6515927/v1), 2025-05-13
Supplement: Supplementary file 3 [file 86deee403ff32755cd7a3978.docx]

**Table 1** Baseline characteristics of patients grouped according to GPR index quartiles

| **variable** | **Total (n=1397)** | **Q1** (≤**1.549) (n=280)** | **Q2** **(1.549,1.876] (n=279)** | **Q3** **(1.876,2.31] (n=279)** | **Q4** **(2.31,3.033] (n=279)** | **Q5** **(≥3.033) (n=280)** | **p** |
| --- | --- | --- | --- | --- | --- | --- | --- |
| **Demographics** |  |  |  |  |  |  |  |
| Age | 71.182(60.393,78.887) | 70.004(59.888,78.185) | 70.076(60.193,79.704) | 72.329(60.231,81.066) | 72.947(61.500,79.857) | 69.800(59.673,77.134) | 0.121 |
| Gender, n (%) |  |  |  |  |  |  | 0.159 |
| Female | 583(41.732) | 122(43.571) | 99(35.484) | 116(41.577) | 127(45.520) | 119(42.500) |  |
| Male | 814(58.268) | 158(56.429) | 180(64.516) | 163(58.423) | 152(54.480) | 161(57.500) |  |
| **Vital signs** |  |  |  |  |  |  |  |
| HR Mean, beats/min | 87.131 ± 16.694 | 86.458 ± 15.369 | 86.906 ± 17.162 | 88.582 ± 16.547 | 86.272 ± 16.543 | 87.440 ± 17.772 | 0.486 |
| SBP Mean, mmHg | 106.558 ± 12.285 | 105.583 ± 10.320 | 106.288 ± 11.846 | 106.388 ± 12.276 | 107.400 ± 12.959 | 107.134 ± 13.755 | 0.423 |
| DBP Mean, mmHg | 61.775 ± 10.624 | 60.506 ± 10.235 | 62.219 ± 10.360 | 61.702 ± 10.705 | 62.790 ± 11.099 | 61.660 ± 10.643 | 0.132 |
| RR Mean, times/min | 20.104 ± 3.722 | 19.547 ± 3.513 | 19.669 ± 3.206 | 20.333 ± 3.682 | 20.111 ± 3.870 | 20.858 ± 4.144 | <0.001 |
| Temperature Mean, °C | 36.681 ± 0.675 | 36.720 ± 0.418 | 36.719 ± 0.478 | 36.811 ± 0.521 | 36.729 ± 0.563 | 36.427 ± 1.098 | <0.0001 |
| **Laboratory indicators** |  |  |  |  |  |  |  |
| RBC Max, 10^9/L | 3.700(3.270,4.200) | 3.595(3.168,4.023) | 3.800(3.340,4.230) | 3.700(3.220,4.226) | 3.720(3.300,4.165) | 3.740(3.364,4.263) | 0.039 |
| WBC Max, 10^9/L | 12.200(9.200,16.060) | 11.550(8.400,15.325) | 11.200(8.650,14.940) | 12.320(9.450,15.600) | 12.100(9.200,15.650) | 14.150(10.775,18.625) | <0.0001 |
| Platelet Max, 10^9/L | 184.000(142.000,238.000) | 174.000(131.000,224.000) | 181.000(141.000,230.000) | 190.000(144.500,248.000) | 190.000(143.000,248.500) | 190.900(147.750,254.000) | <0.01 |
| Hemoglobin Max, g/dl | 11.164 ± 2.008 | 10.964 ± 1.918 | 11.382 ± 2.007 | 11.151 ± 2.003 | 10.970 ± 1.979 | 11.353 ± 2.103 | 0.024 |
| MCV (fL) | 91.440 ± 6.633 | 92.024 ± 6.572 | 91.733 ± 6.273 | 91.590 ± 6.503 | 91.143 ± 6.932 | 90.709 ± 6.828 | 0.146 |
| RDW (%) | 15.264 ± 2.243 | 15.268 ± 2.232 | 15.226 ± 2.192 | 15.484 ± 2.408 | 15.361 ± 2.206 | 14.983 ± 2.151 | 0.104 |
| Glucose Max, mg/dl | 167.000(133.000,228.000) | 112.000(102.000,124.000) | 139.000(128.500,151.500) | 166.000(152.000,180.000) | 208.000(190.000,231.000) | 326.000(274.000,393.250) | <0.0001 |
| BUN Max, mg/dl | 25.000(18.000,38.000) | 22.000(16.000,36.000) | 23.000(18.000,34.500) | 25.000(17.000,39.000) | 27.000(19.000,39.000) | 27.000(19.000,38.250) | <0.01 |
| Creatinine Max, mg/dl | 1.354 ± 0.506 | 1.283 ± 0.468 | 1.318 ± 0.480 | 1.323 ± 0.521 | 1.396 ± 0.514 | 1.448 ± 0.530 | <0.001 |
| ALT Max, U/L | 63.000(27.000,167.200) | 62.200(22.750,174.300) | 66.000(27.500,144.100) | 48.000(24.500,121.600) | 62.000(26.000,152.500) | 98.500(38.000,235.250) | <0.001 |
| AST Max, U/L | 147.000(42.000,317.000) | 148.300(36.000,301.700) | 148.000(40.000,305.600) | 117.000(38.500,264.500) | 143.000(42.500,321.600) | 189.000(63.000,432.100) | <0.001 |
| Potassium Max, mmol/l | 4.527 ± 0.469 | 4.660 ± 0.435 | 4.536 ± 0.477 | 4.469 ± 0.444 | 4.452 ± 0.479 | 4.519 ± 0.482 | <0.0001 |
| Chloride Max, mEq/L | 103.513 ± 6.926 | 103.889 ± 5.740 | 103.572 ± 6.460 | 102.763 ± 6.731 | 103.082 ± 7.772 | 104.254 ± 7.661 | 0.078 |
| Anion gap, mmol/L | 15.314 ± 4.531 | 13.686 ± 3.732 | 14.384 ± 3.868 | 15.216 ± 4.151 | 15.663 ± 4.239 | 17.619 ± 5.462 | <0.0001 |
| Bilirubin, umol/L | 0.900(0.600,1.400) | 0.900(0.600,1.400) | 0.960(0.640,1.500) | 0.900(0.600,1.500) | 0.860(0.600,1.300) | 0.800(0.500,1.200) | <0.001 |
| GPR | 2.445 ± 1.393 | 1.344 ± 0.153 | 1.714 ± 0.093 | 2.082 ± 0.128 | 2.632 ± 0.210 | 4.449 ± 1.917 | <0.0001 |
| **Medication situation** |  |  |  |  |  |  |  |
| Norepinephrine |  |  |  |  |  |  | <0.01 |
| yes | 880(62.992) | 164(58.571) | 161(57.706) | 184(65.950) | 170(60.932) | 201(71.786) |  |
| no | 517(37.008) | 116(41.429) | 118(42.294) | 95(34.050) | 109(39.068) | 79(28.214) |  |
| Dobutamine |  |  |  |  |  |  | <0.01 |
| yes | 387(27.702) | 69(24.643) | 59(21.147) | 80(28.674) | 84(30.108) | 95(33.929) |  |
| no | 1010(72.298) | 211(75.357) | 220(78.853) | 199(71.326) | 195(69.892) | 185(66.071) |  |
| Dopamine |  |  |  |  |  |  | <0.0001 |
| yes | 247(17.681) | 34(12.143) | 29(10.394) | 47(16.846) | 53(18.996) | 84(30.000) |  |
| no | 1150(82.319) | 246(87.857) | 250(89.606) | 232(83.154) | 226(81.004) | 196(70.000) |  |
| ACEI/ARB |  |  |  |  |  |  | 0.017 |
| yes | 787(56.335) | 163(58.214) | 169(60.573) | 158(56.631) | 164(58.781) | 133(47.500) |  |
| no | 610(43.665) | 117(41.786) | 110(39.427) | 121(43.369) | 115(41.219) | 147(52.500) |  |
| Diuretic |  |  |  |  |  |  | <0.0001 |
| yes | 1230(88.046) | 258(92.143) | 257(92.115) | 245(87.814) | 250(89.606) | 220(78.571) |  |
| no | 167(11.954) | 22(7.857) | 22(7.885) | 34(12.186) | 29(10.394) | 60(21.429) |  |
| Potassium-sparing diuretic |  |  |  |  |  |  | 0.171 |
| yes | 271(19.399) | 60(21.429) | 60(21.505) | 57(20.430) | 54(19.355) | 40(14.286) |  |
| no | 1126(80.601) | 220(78.571) | 219(78.495) | 222(79.570) | 225(80.645) | 240(85.714) |  |
| IABP |  |  |  |  |  |  | <0.001 |
| yes | 311(22.262) | 41(14.643) | 63(22.581) | 70(25.090) | 55(19.713) | 82(29.286) |  |
| no | 1086(77.738) | 239(85.357) | 216(77.419) | 209(74.910) | 224(80.287) | 198(70.714) |  |
| **Comorbidities** |  |  |  |  |  |  |  |
| Heart failure, n (%) |  |  |  |  |  |  | <0.01 |
| yes | 1082(77.452) | 224(80.000) | 219(78.495) | 225(80.645) | 221(79.211) | 193(68.929) |  |
| no | 315(22.548) | 56(20.000) | 60(21.505) | 54(19.355) | 58(20.789) | 87(31.071) |  |
| Respiratory failure, n (%) |  |  |  |  |  |  | <0.0001 |
| yes | 583(41.732) | 88(31.429) | 102(36.559) | 117(41.935) | 130(46.595) | 146(52.143) |  |
| no | 814(58.268) | 192(68.571) | 177(63.441) | 162(58.065) | 149(53.405) | 134(47.857) |  |
| Hypertension, n (%) |  |  |  |  |  |  | 0.091 |
| yes | 1002(71.725) | 195(69.643) | 200(71.685) | 186(66.667) | 207(74.194) | 214(76.429) |  |
| no | 395(28.275) | 85(30.357) | 79(28.315) | 93(33.333) | 72(25.806) | 66(23.571) |  |
| Diabetes, n (%) |  |  |  |  |  |  | <0.0001 |
| yes | 472(33.787) | 54(19.286) | 53(18.996) | 85(30.466) | 116(41.577) | 164(58.571) |  |
| no | 925(66.213) | 226(80.714) | 226(81.004) | 194(69.534) | 163(58.423) | 116(41.429) |  |
| Stroke, n (%) |  |  |  |  |  |  | 0.232 |
| yes | 113(8.089) | 17(6.071) | 31(11.111) | 19(6.810) | 23(8.244) | 23(8.214) |  |
| no | 1284(91.911) | 263(93.929) | 248(88.889) | 260(93.190) | 256(91.756) | 257(91.786) |  |
| AMI, n (%) |  |  |  |  |  |  | <0.0001 |
| yes | 569(40.730) | 77(27.500) | 96(34.409) | 116(41.577) | 119(42.652) | 161(57.500) |  |
| no | 828(59.270) | 203(72.500) | 183(65.591) | 163(58.423) | 160(57.348) | 119(42.500) |  |
| **Disease Severity Score** |  |  |  |  |  |  |  |
| SOFA score | 6.039 ± 3.371 | 5.650 ± 3.189 | 5.376 ± 3.194 | 5.961 ± 3.392 | 5.932 ± 3.146 | 7.275 ± 3.613 | <0.0001 |
| APSIII score | 48.868 ± 19.703 | 44.736 ± 17.850 | 44.491 ± 17.168 | 47.323 ± 18.269 | 48.792 ± 18.017 | 58.979 ± 23.083 | <0.0001 |
| SAPSII score | 39.646 ± 13.533 | 37.546 ± 12.639 | 37.183 ± 12.496 | 39.441 ± 13.057 | 39.197 ± 12.482 | 44.854 ± 15.428 | <0.0001 |
| OASIS score | 32.787 ± 8.700 | 31.657 ± 8.189 | 31.634 ± 8.365 | 33.022 ± 8.700 | 32.136 ± 8.706 | 35.479 ± 8.979 | <0.0001 |
| CCI score | 5.700 ± 2.560 | 5.296 ± 2.444 | 5.430 ± 2.483 | 5.828 ± 2.584 | 5.907 ± 2.553 | 6.039 ± 2.668 | <0.01 |
| **Length Of Stay (LOS)** |  |  |  |  |  |  |  |
| Los in hospital | 10.704(6.457,17.215) | 11.794(7.014,17.304) | 11.627(7.303,16.998) | 11.209(6.867,18.840) | 9.800(6.129,17.387) | 9.574(4.373,16.956) | <0.01 |
| Los in ICU | 3.957(2.112,7.058) | 3.951(2.123,6.333) | 3.887(2.236,6.975) | 4.074(2.111,7.738) | 3.712(2.069,6.240) | 4.597(2.101,9.034) | 0.245 |
| **Outcomes** |  |  |  |  |  |  |  |
| 30-day mortality, n (%) |  |  |  |  |  |  | <0.0001 |
| alive | 1151(82.391) | 248(88.571) | 247(88.530) | 240(86.022) | 229(82.079) | 187(66.786) |  |
| death | 246(17.609) | 32(11.429) | 32(11.470) | 39(13.978) | 50(17.921) | 93(33.214) |  |
| 120-day mortality, n (%) |  |  |  |  |  |  | <0.0001 |
| alive | 1144(81.890) | 247(88.214) | 247(88.530) | 236(84.588) | 228(81.720) | 186(66.429) |  |
| death | 253(18.110) | 33(11.786) | 32(11.470) | 43(15.412) | 51(18.280) | 94(33.571) |  |

Abbreviation: GPR, glucose‑potassium ratio; HR, heart rate; RR, respiratory rate; BMI, body mass index; SBP, systolic blood pressure; DBP, diastolic blood pressure ACEI/ARB, Angiotensin-Converting Enzyme Inhibitor/ angiotensin receptor blocker; IABP, Intra-Aortic Balloon Pump; SOFA, sequential organ failure assessment; CCI, Charlson comorbidity index; APSIII, acute physiology score III; SAPSII, simplified acute physiological score II; OASIS, oxford acute severity of illness score; AMI, acute myocardial infarction; WBC, white blood cell; RBC, red blood cell; MCV, mean corpuscular volume; RDW, Red blood cell distribution width; BUN, blood urea nitrogen; AST, Aspartate aminotransferase; ALT, alanine aminotransferase

**Table 2** Cox proportional hazard models for 30 and 120-day all-cause mortality

| **Variables** | Model1 | | Model2 | | Model3 | |
| --- | --- | --- | --- | --- | --- | --- |
| HR (95%CI) | *P* | HR (95%CI) | *P* | HR (95%CI) | *P* |
| **30-day all-cause mortality** |  |  |  |  |  |  |
| Continuous variable (per unit) | 1.227(1.172,1.285) | <0.0001 | 1.23(1.171,1.292) | <0.0001 | 1.233(1.160,1.311) | <0.0001 |
| GPR quantile |  |  |  |  |  |  |
| 1 (N=280) | 1.00 (Reference) |  | 1.00 (Reference) |  | 1.00 (Reference) |  |
| 2 (N=279) | 1.014(0.621,1.654) | 0.957 | 1.014(0.620,1.658) | 0.957 | 0.948(0.577,1.560) | 0.834 |
| 3 (N=279) | 1.220(0.764,1.947) | 0.404 | 1.179(0.738,1.883) | 0.490 | 1.045(0.650,1.679) | 0.856 |
| 4 (N=279) | 1.630(1.046,2.540) | 0.031 | 1.500(0.962,2.340) | 0.074 | 1.391(0.883,2.190) | 0.155 |
| 5 (N=280) | 3.160(2.114,4.723) | <0.0001 | 3.164(2.114,4.735) | <0.0001 | 2.341(1.511,3.629) | <0.001 |
| **120-day all-cause mortality** |  |  |  |  |  |  |
| Continuous variable (per unit) | 1.227(1.172,1.285) | <0.0001 | 1.226(1.168,1.287) | <0.0001 | 1.23(1.158,1.307) | <0.0001 |
| GPR quantile |  |  |  |  |  |  |
| 1 (N=280) | 1.00 (Reference) |  | 1.00 (Reference) |  | 1.00 (Reference) |  |
| 2 (N=279) | 0.982(0.604,1.597) | 0.942 | 0.975(0.599,1.590) | 0.921 | 0.917(0.560,1.503) | 0.731 |
| 3 (N=279) | 1.307(0.830,2.058) | 0.247 | 1.260(0.800,1.985) | 0.318 | 1.123(0.708,1.781) | 0.622 |
| 4 (N=279) | 1.613(1.041,2.499) | 0.032 | 1.485(0.957,2.303) | 0.077 | 1.380(0.882,2.159) | 0.159 |
| 5 (N=280) | 3.094(2.081,4.601) | <0.0001 | 3.109(2.087,4.630) | <0.0001 | 2.320(1.505,3.575) | <0.001 |

HR: Hazard Ratio, CI: Confidence Interval, GPR, glucose‑potassium ratio

Model1: Crude

Model2: Adjust: age, gender

Model3: model2 plus RBC, WBC, Platelet, Epinephrine, Diuretic, IABP, Heart failure, Hypertension, Diabetes, acute myocardial infarction, Stroke, CCI score

**Table3**.Threshold effect analysis of GPR on 30-day all-cause mortality in CS patients

| **30-day mortality** | **HR (95% CI), P-value** |
| --- | --- |
| Fitting by the standard cox regression | 1.121(1.046,1.201) 0.001 |
| Fitting by the two-piecewise linear regression |  |
| Inflection point | 2.081 |
| GPR < 2.081 | 0.846(0.630,1.138) 0.269 |
| GPR ≥ 2.081 | 1.187(1.098, 1.284) <0.0001 |
| P for Log-likelihood ratio | <0.01 |

**Table4**.Threshold effect analysis of GPR on 120-day all-cause mortality in CS patients

| **120-day mortality** | **HR (95% CI), P-value** |
| --- | --- |
| Fitting by the standard cox regression | 1.227(1.172,1.285) <0.0001 |
| Fitting by the two-piecewise linear regression |  |
| Inflection point | 2.081 |
| GPR < 2.081 | 0.871(0.385,1.968) 0.739 |
| GPR ≥ 2.081 | 1.179(1.112,1.250) <0.0001 |
| P for Log-likelihood ratio | <0.01 |

GPR, glucose‑potassium ratio; The inflection of threshold effect analysis of GPR on 120-day all-cause mortality was 2.081
